# Supplementary material
Source: Springer Nature journal article supplement (https://www.springermedizin.de/resource/supplementary/12873_2008_66_MOESM2_ESM.pdf/9431894)
Supplement: MOESM2 [file 9431894]

**Table 2. Acute poisonings treated in outpatient clinic**

|                            |                        | All outpatient clinic patients |       | Transferred to hospital |       | Discharged from outpatient clinic without transfer |       | p-value (transferred vs. discharged) |
|----------------------------|------------------------|--------------------------------|-------|-------------------------|-------|----------------------------------------------------|-------|--------------------------------------|
|                            |                        | n                              | %     | n                       | %     | n                                                  | %     |                                      |
| Age (years)                | Median                 | 37                             |       | 36                      |       | 37                                                 |       | 0.10*                                |
|                            | IQR                    | 26–46                          |       | 26–44                   |       | 26–47                                              |       |                                      |
| Gender                     | Males                  | 647                            | (68)  | 92                      | (59)  | 555                                                | (69)  | 0.02 <sup>†</sup>                    |
|                            | Females                | 309                            | (32)  | 63                      | (41)  | 246                                                | (31)  |                                      |
| Main agents                | Ethanol                | 472                            | (49)  | 33                      | (21)  | 439                                                | (55)  | < 0.001                              |
|                            | Opiates                | 207                            | (22)  | 19                      | (12)  | 188                                                | (24)  | 0.002                                |
|                            | Sedatives              | 91                             | (10)  | 34                      | (22)  | 57                                                 | (7)   | < 0.001                              |
|                            | Other illicit drugs    | 59                             | (6)   | 14                      | (9)   | 45                                                 | (6)   | 0.11                                 |
|                            | Paracetamol            | 22                             | (2)   | 15                      | (10)  | 7                                                  | (1)   | < 0.001                              |
|                            | Neuroleptics           | 19                             | (2)   | 8                       | (5)   | 11                                                 | (1)   | 0.002                                |
|                            | Antidepressants        | 8                              | (1)   | 4                       | (3)   | 4                                                  | (1)   | 0.01 <sup>†</sup>                    |
|                            | Other agents           | 78                             | (8)   | 28                      | (18)  | 50                                                 | (6)   | < 0.001                              |
| Consciousness <sup>‡</sup> | Awake                  | 322                            | (34)  | 48                      | (31)  | 274                                                | (34)  | 0.44                                 |
|                            | Somnolent              | 510                            | (53)  | 63                      | (41)  | 447                                                | (56)  | 0.001                                |
|                            | Comatose               | 112                            | (12)  | 35                      | (23)  | 77                                                 | (10)  | < 0.001                              |
|                            | Deeply comatose        | 12                             | (1)   | 9                       | (6)   | 3                                                  | (0.4) | < 0.001                              |
| Complications <sup>‡</sup> | Respiratory depression | 53                             | (6)   | 18                      | (12)  | 35                                                 | (4)   | < 0.001                              |
|                            | Arrhythmias            | 9                              | (1)   | 2                       | (1)   | 7                                                  | (1)   | 0.62                                 |
|                            | Hypotension            | 22                             | (2)   | 10                      | (7)   | 12                                                 | (2)   | < 0.001                              |
|                            | Cardiac arrest         | 0                              | (0)   | –                       | –     | –                                                  | –     | NA                                   |
|                            | Dead                   | 0                              | (0)   | –                       | –     | –                                                  | –     | NA                                   |
| Activated charcoal         |                        | 13                             | (1)   | 7                       | (5)   | 6                                                  | (1)   | < 0.001                              |
| Antidotes                  | Naloxone or flumazenil | 55                             | (6)   | 21                      | (14)  | 34                                                 | (4)   | < 0.001                              |
| Total                      |                        | 956                            | (100) | 155                     | (100) | 801                                                | (100) |                                      |

IQR = Inter-quartile range

\*Mann–Whitney U-test

<sup>†</sup>Not significant when the whole table is corrected for multiple calculations by the Holm–Bonferroni method<sup>‡</sup>As presented in the outpatient clinic, independent of possible antecedent treatment in the ambulance
